# Supplementary material for: The Prevalence, Morphological Types and Factors Associated with Anemia Among Under- Five Children Hospitalized at Muhimbili National Hospital in Dar Es Salaam, Tanzania
Source: Research Square preprint supplement (doi:10.21203/rs.3.rs-3300154/v1), 2023-09-21
Supplement: Supplementary file 1 [file 3c9717e4028e1f55991c919d.docx]

Table 1: Socio-demographics characteristics of the study participants.

**Variable Frequency Percentage (%)**

**Sex**

Male 86 61.9

Female 53 38.1

**Age**

≤ 2 years 73 52.5

> 2 years 66 47.5

**Caretaker’s education**

No formal education 12 8.6

Primary 61 43.9

Secondary 48 34.5

Collage/University 18 12.9

**Caretaker’s occupation**

Housewife 51 36.7

Small scale entrepreneurs 60 43.2

Peasant 15 10.8

Formal employee 13 9.4

**Nutritional status**

Normal 85 61.2

Mild malnutrition 20 14.4

Moderate malnutrition 11 7.9

Severe malnutrition 23 16.5

**Birth order**

≤ 3 babies 116 83.5

> 3 babies 23 16.5

**Delivery status**

Preterm 15 10.8

Term 124 89.2

**Birth weight (Kg)**

< 2.5 19 13.7

≥ 2.5 120 86.3

**Weaning period**

≤ 6 month 34 24.5

> 6 month 105 75.5

Table 2: Logistic regression analysis for factors associated with anemia among the study participants.

**Variable** **Anemia (%)** **No anemia (%)** **Unadjusted** **Adjusted**

**OR** **P- value**  **OR** **p-value**

**Age**

≤ 2 years 64(87.7) 9(12.3) 1.422(0.549-3.684) 0.468 - -

> 2 years 55(83.3) 11(16.7) 1

**Sex**

Male 74(86.0) 12(14.0) 1.096(0.416-2.887) 0.852 - -

Female 45(84.9) 8(15.1) 1

**Birth status**

Term 105(84.7) 19(15.3) 1

Preterm 14(93.3) 1(6.7) 2.533(0.314-20.416) 0.383 - -

**Birth weight**

Normal 100(83.3) 20(16.7) 1

Low 19(100) 0(0) 323094968.6(0.000) 0.998 - -

**Weaning period**

≤ 6 months 32(94.1) 2(5.9) 3.310(0.727-15.076) 0.122 - -

> 6 months 87(82.9) 18(17.1) 1

**Nutritional status**

Normal 68(80.0) 17(20.0) 1

Wasted 51(94.4) 3(5.6) 4.25(1.182-15.285) 0.027 3.142(0.683-14.448) 0.141

**Treating water**

Yes 69(80.2) 17(19.8) 1

No 50(94.3) 3(5.7) 4.106(1.141-14.772) 0.031 2.965(0.716-12.276) 0.134

**Washing hands**

Yes 105(84.7) 19(15.3) 1

No 14(93.3) 1(6.7) 2.533(0.314-20.416) 0.383 - -

**Last anthelminthic**

≤ 3 months 23(65.7) 12(34.3) 1

> 3 months 83(91.2) 8(8.8) 5.413(1.978-14.814) 0.001 3.677(1.127-12.004) **0.031**

**No. of meals per day**

One 2(100.0) 0(0.0)

Two 1(100) 0(0.0) 260560458.5(0.000) 0.999 - -

Three 54(84.4) 10(15.6) 0.887(0.344-2.291) 0.805 - -

Per demand 62(86.1) 10(13.9) 1

**Eating vegetables**

Everyday 18(72.0) 7(28.0) 1

≥ 3 days 50(83.3) 10(16.7) 1.944(0.643-5.876) 0.239 1.754(0.436-7.049) 0.428

Occasionally 43(93.5) 3(6.5) 5.574(1.294-24.005) 0.021 3.521(0.677-18.581) 0.138

**Eating meals with tea**

Yes 88(92.6) 7(7.4) 5.272(1.928-14.415) 0.001 4.595(1.467-14.391) **0.009**

No 31(70.5) 13(29.5) 1

**Presence of chronic disease**

No 65(82.3) 14(17.7) 1

Yes 54(90.0) 6(10.0) 1.938(0.697-5.388) 0.204 - -

**Sickle cell disease in the family**

No 100(84.0) 19(16.0) 1

Yes 19(95.0) 1(5.0) 3.610(0.456-28.604) 0.224
